# Supplementary material for: Coaxial-nanostructured MnFe2O4 nanoparticles on polydopamine-coated MWCNT for anode materials in rechargeable batteries
Source: Royal Society of Chemistry journal article supplement (doi:10.1039/c8nr04555k), 2018-01-01
Supplement: c8nr04555k1.pdf [file c8nr04555k1.pdf]

## ***Supplementary Information***

### **Coaxial-nanostructured MnFe<sub>2</sub>O<sub>4</sub> nanoparticles on polydopamine-coated MWCNT for anode materials in rechargeable batteries**

**Hyeongwoo Kim<sup>a,b</sup>, Jong-Won Lee<sup>c</sup>, Dongjin Byun<sup>b</sup>, Wonchang Choi<sup>a,d,\*</sup>**

<sup>a</sup> Centre for Energy Storage Research, Korea Institute of Science and Technology, 5, Hwarang-ro 14-gil, Seongbuk-gu, Seoul 02792, Republic of Korea

<sup>b</sup> Department of Materials Science and Engineering, Korea University, 145, Anam-ro, Seongbuk-gu, Seoul 02841, Republic of Korea

<sup>c</sup> Department of Materials Science and Engineering, Chosun University, 309 Pilmun-daero, Dong-gu, Gwangju 61452, Republic of Korea

<sup>d</sup> Division of Energy & Environment Technology, KIST School, Korea University of Science and Technology, 5, Hwarang-ro 14-gil, Seongbuk-gu, Seoul 02792, Republic of Korea

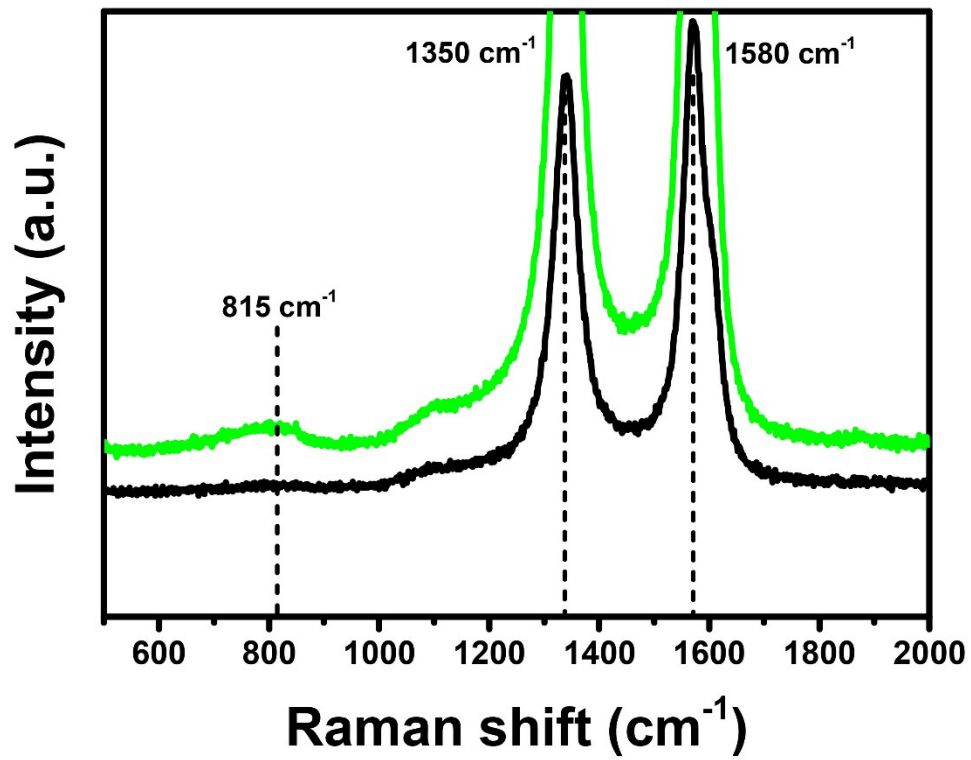

**Fig. S1** Raman spectra of pristine MWCNT (black line) and PDA-coated MWCNT (green line).

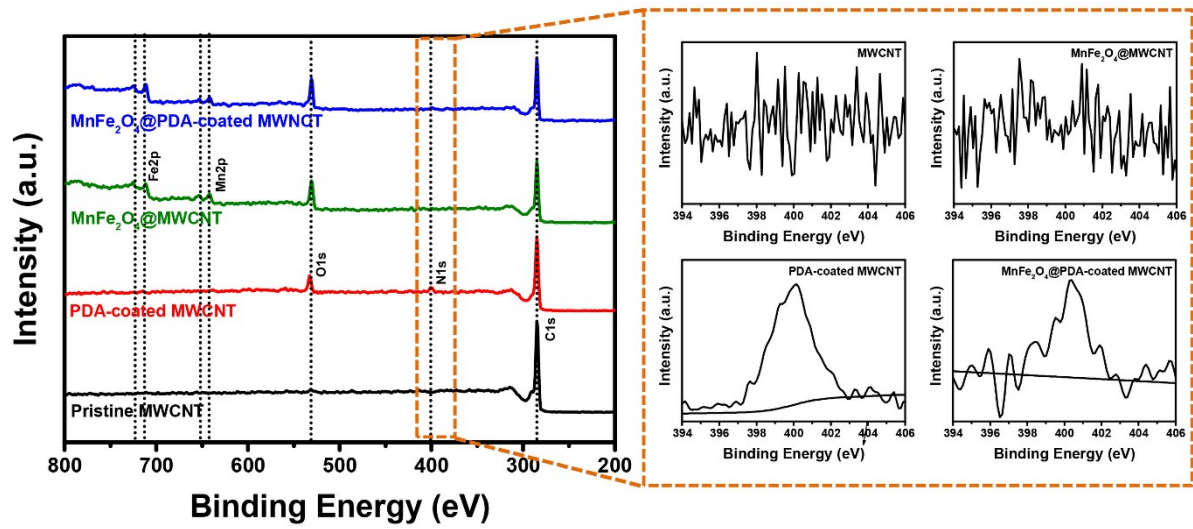

Fig. S2 XPS full scan and N1s narrow scan spectra for the as-prepared samples.

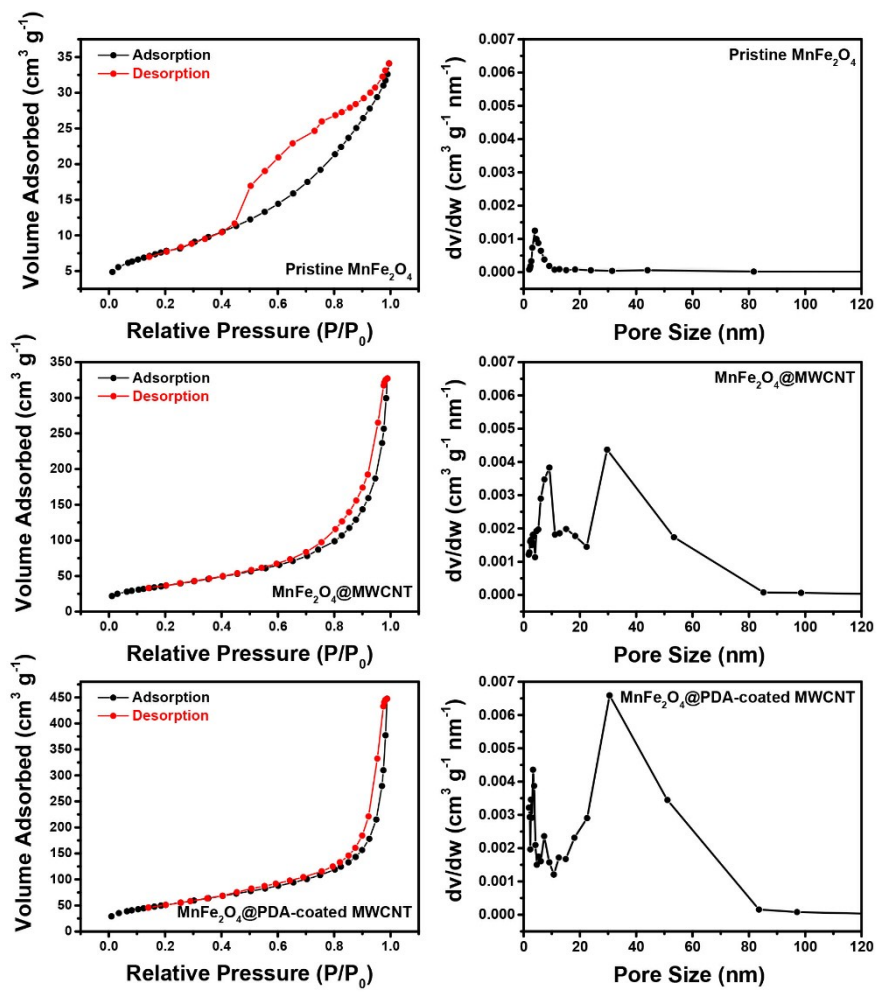

**Fig. S3**  $N_2$  adsorption-desorption isotherm and pore size distribution of the as-prepared samples.

**Table S1** Results of BET analyses of the as-prepared samples

| <b>Sample</b>                                          | <b>Surface area (m<sup>2</sup> g<sup>-1</sup>)</b> |
|--------------------------------------------------------|----------------------------------------------------|
| <b>Pristine MnFe<sub>2</sub>O<sub>4</sub></b>          | 28.14                                              |
| <b>MnFe<sub>2</sub>O<sub>4</sub>@MWCNT</b>             | 131.9                                              |
| <b>MnFe<sub>2</sub>O<sub>4</sub>@PDA-coated MWCNT.</b> | 185.5                                              |

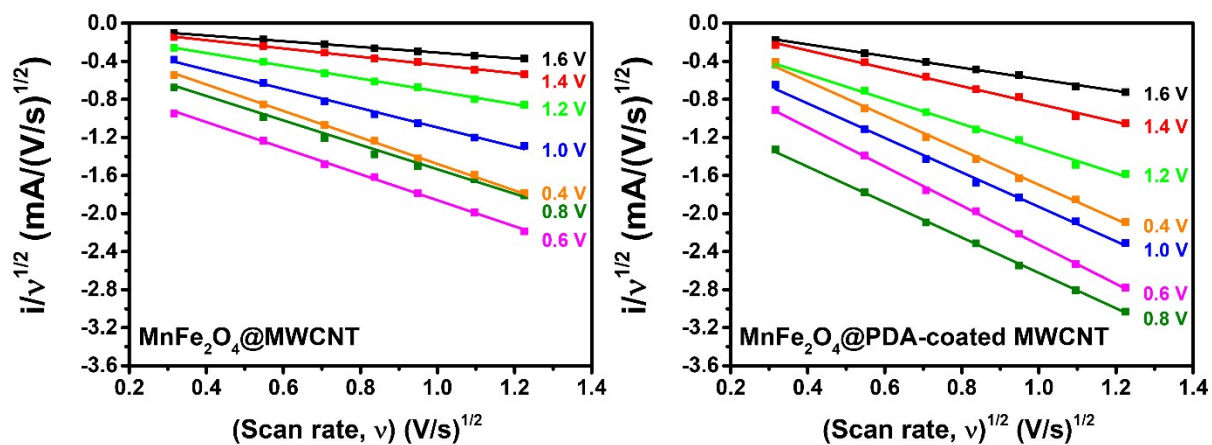

**Fig. S4**  $i/v^{1/2}$  vs.  $v^{1/2}$  plots for the MnFe<sub>2</sub>O<sub>4</sub>@MWCNT and MnFe<sub>2</sub>O<sub>4</sub>@PDA-coated MWCNT using the cathodic current in the potential range of 1.6 ~ 0.4 V (vs. Li<sup>+</sup>/Li) at various scan rates (0.1 ~ 1.5 mV s<sup>-1</sup>).
